# Supplementary material
Source: publisher site journal article supplement (https://www.dovepress.com/get_supplementary_file.php?f=491626.docx)
Supplement: Supplementary file 1 [file get_supplementary_file.php]

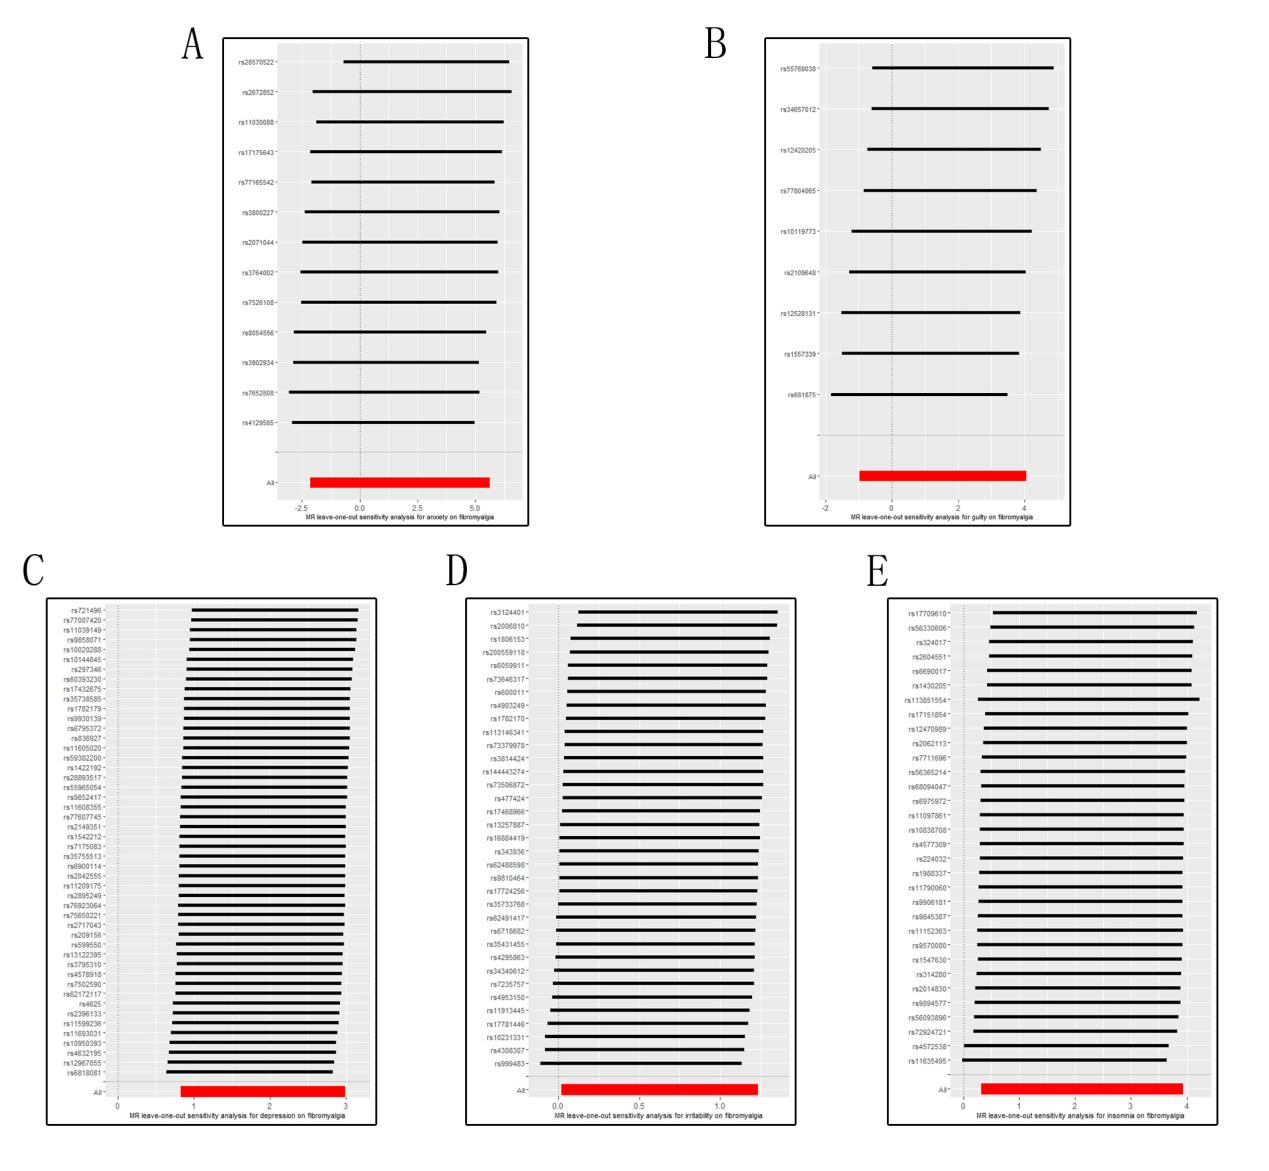
Figure S1. The “leave-one-out” analysis plots for analysis of mental disorders and insomnia with risk of fibromyalgia. A. MR leave-one-out sensitivity analysis for anxiety on fibromyalgia. B. MR leave-one-out sensitivity analysis for guility on fibromyalgia. C. MR leave-one-out sensitivity analysis for depression on fibromyalgia. D. MR leave-one-out sensitivity analysis for irritability on fibromyalgia. E. MR leave-one-out sensitivity analysis for insomnia on fibromyalgia.


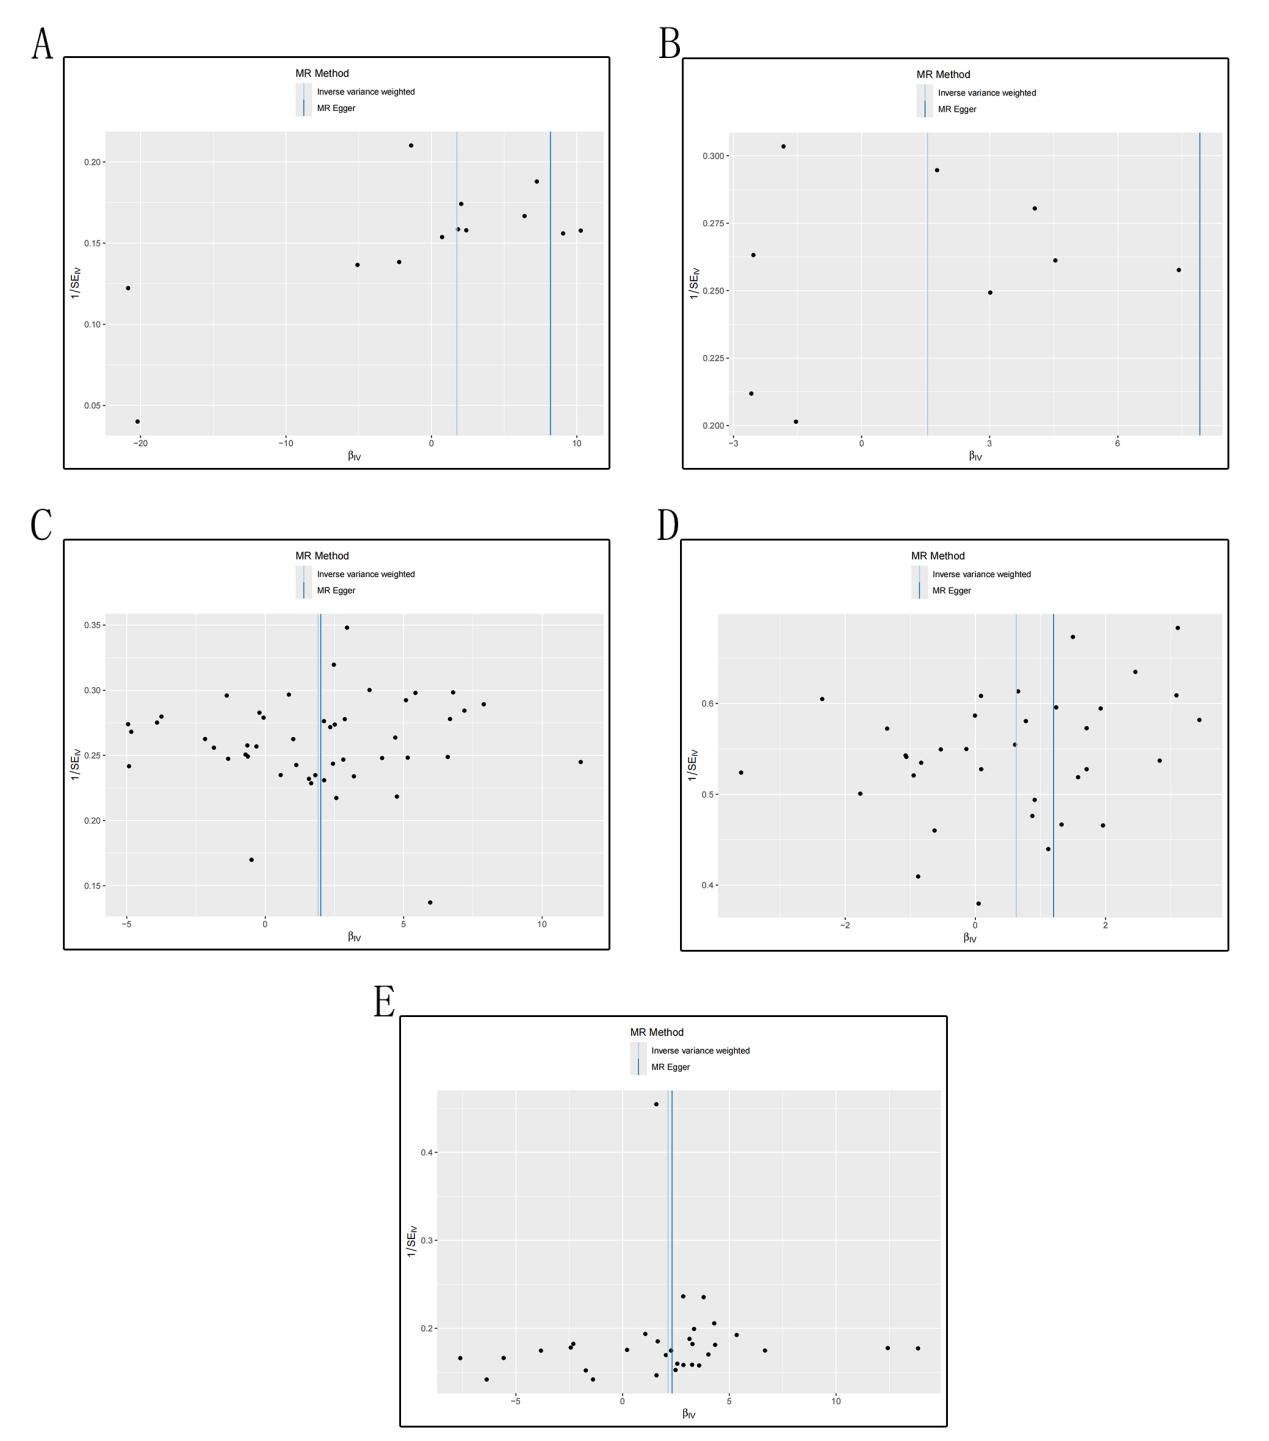
Figure S2. The funnel plots for analysis of mental disorders and insomnia with risk of fibromyalgia. A. MR funnel plot for analysis of anxiety on fibromyalgia. B. MR funnel plot for analysis of guility on fibromyalgia. C. MR funnel plot for analysis of depression on fibromyalgia. D. MR funnel plot for analysis of irritability on fibromyalgia. E. MR funnel plot for analysis of insomnia on fibromyalgia.


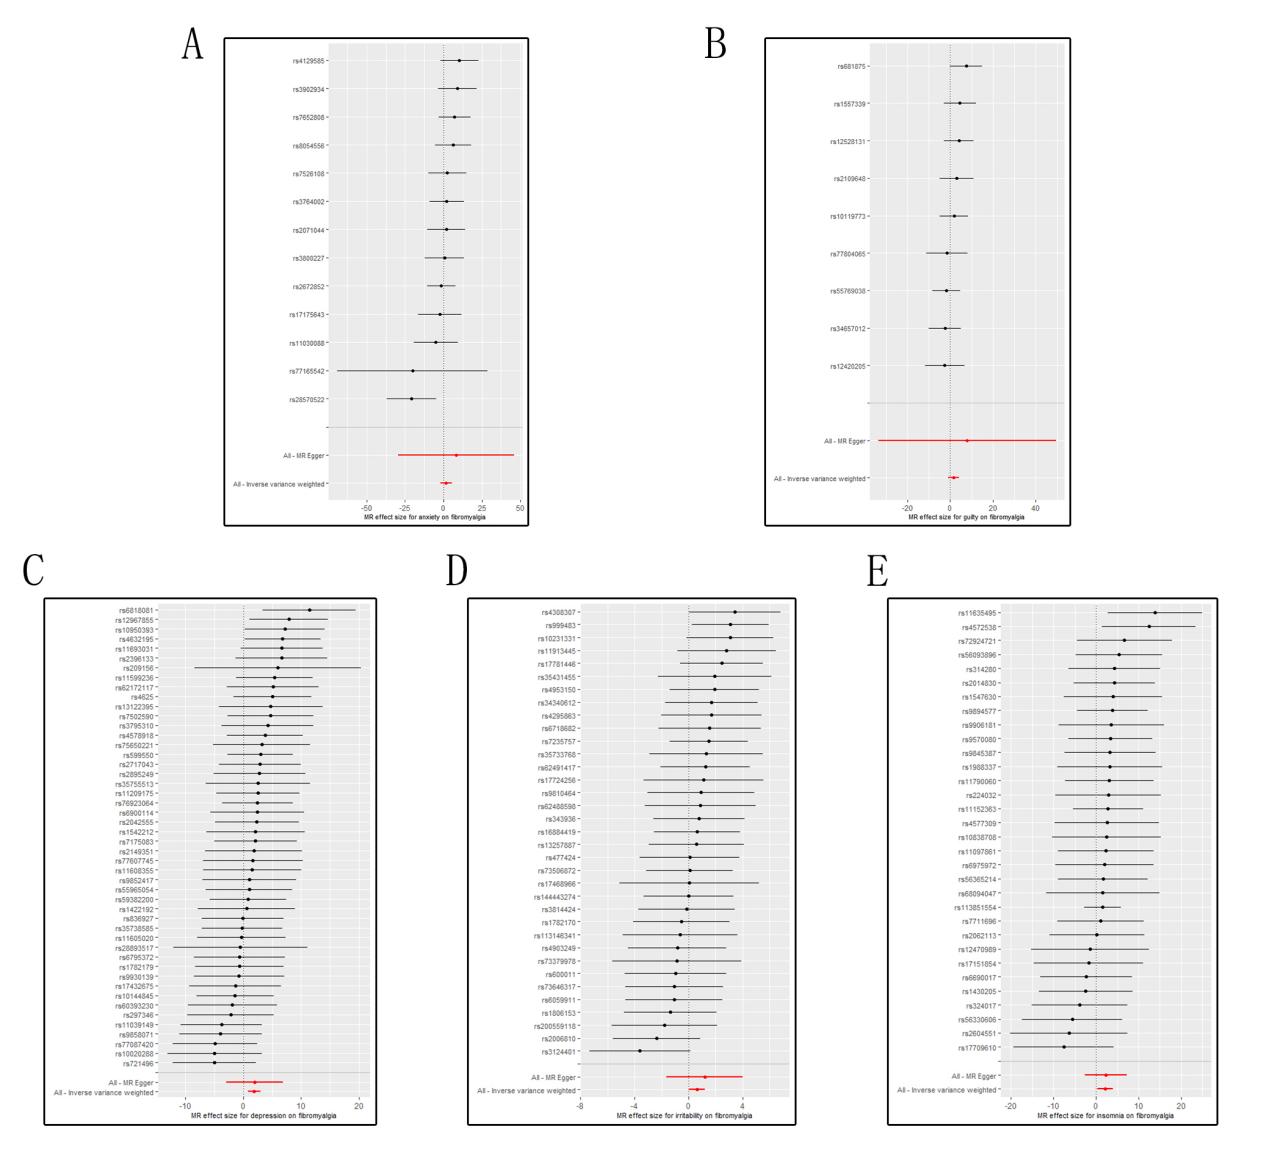
Figure S3. The forest plots for analysis of mental disorders and insomnia with risk of fibromyalgia.

A. MR forest plot for analysis of anxiety on fibromyalgia. B. MR forest plot for analysis of guility on fibromyalgia. C. MR forest plot for analysis of depression on fibromyalgia. D. MR forest plot for analysis of irritability on fibromyalgia. E. MR forest plot for analysis of insomnia on fibromyalgia.


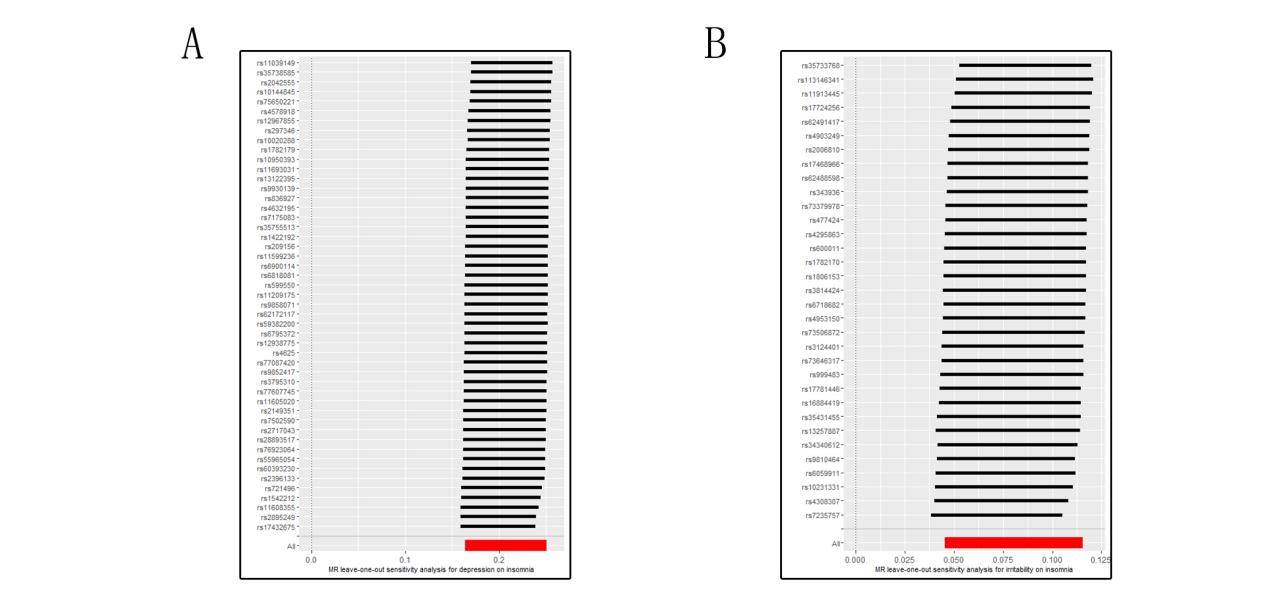


Figure S4. The “leave-one-out” analysis plots for analysis of depression and irritability with risk of insomnia. A. MR leave-one-out sensitivity analysis for depression on insomnia. B. MR leave-one-out sensitivity analysis for irritability on insomnia.


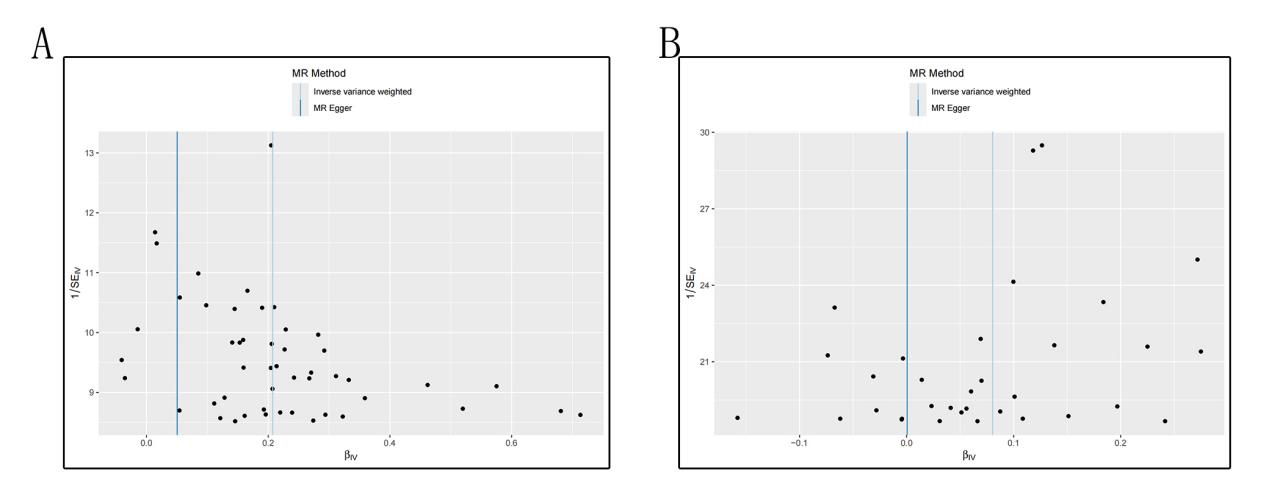
Figure S5. The funnel plots for analysis of depression and irritability with risk of insomnia. A. MR funnel plot for analysis of depression on insomnia. B. MR funnel plot for analysis of irritability on insomnia.


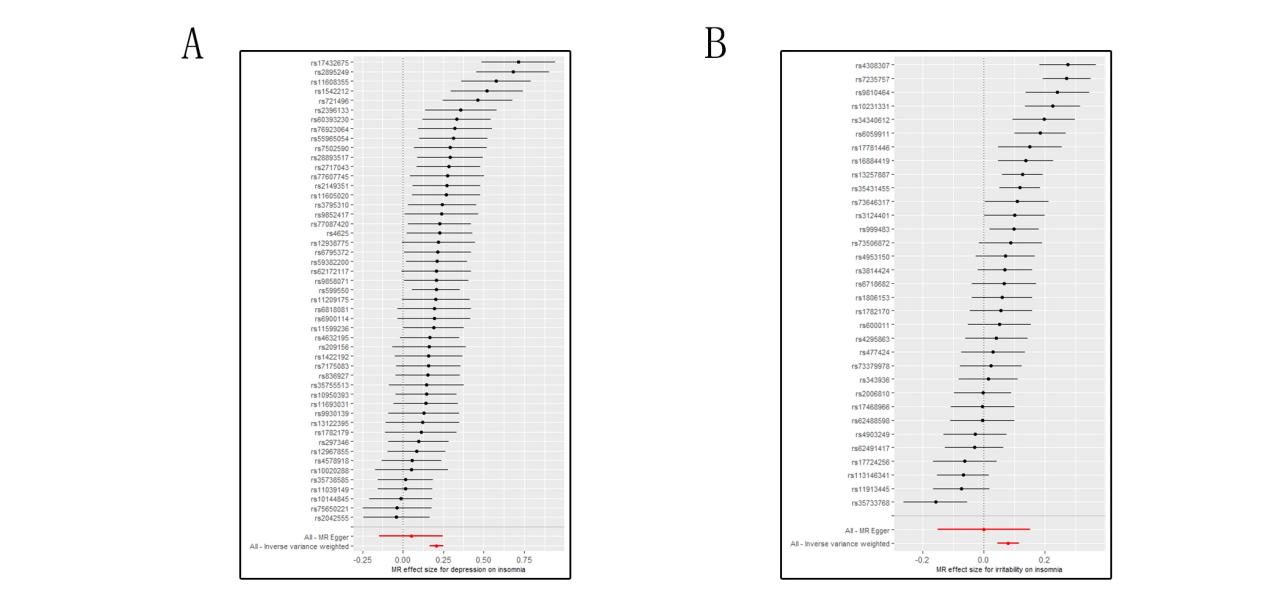


Figure S6. The forest plots for analysis of depression and irritability with risk of insomnia. A. MR forest plot for analysis of depression on insomnia. B. MR forest plot for analysis of irritability on insomnia.

| Table S1 Characteristics of selected SNPs | | | | | | | | | |
| --- | --- | --- | --- | --- | --- | --- | --- | --- | --- |
| exposure | outcome | SNP | ea | oa | beta | eaf | se | pval | F statistic |
| anxitey | fibromyalgia | rs11030088 | A | G | -0.0084 | 0.244 | 0.0015 | 2.02E-08 | 31.35976775 |
| anxitey | fibromyalgia | rs17175643 | T | C | -0.0092 | 0.2638 | 0.0015 | 1.28E-09 | 37.61749919 |
| anxitey | fibromyalgia | rs2071044 | T | C | -0.0084 | 0.4638 | 0.0015 | 4.31E-08 | 31.35976775 |
| anxitey | fibromyalgia | rs2672852 | T | C | 0.0112 | 0.5124 | 0.0015 | 2.85E-13 | 55.75069823 |
| anxitey | fibromyalgia | rs28570522 | G | A | 0.0084 | 0.6226 | 0.0015 | 3.81E-08 | 31.35976775 |
| anxitey | fibromyalgia | rs3764002 | T | C | 0.0097 | 0.26 | 0.0015 | 2.41E-10 | 41.81746808 |
| anxitey | fibromyalgia | rs3800227 | G | A | -0.0087 | 0.7299 | 0.0016 | 2.49E-08 | 29.56618729 |
| anxitey | fibromyalgia | rs3902934 | G | A | -0.0085 | 0.3932 | 0.0015 | 2.39E-08 | 32.1108733 |
| anxitey | fibromyalgia | rs4129585 | C | A | -0.0085 | 0.5733 | 0.0015 | 2.17E-08 | 32.1108733 |
| anxitey | fibromyalgia | rs7526108 | A | G | 0.009 | 0.767 | 0.0015 | 3.77E-09 | 35.99973339 |
| anxitey | fibromyalgia | rs7652808 | G | T | 0.0112 | 0.6523 | 0.0015 | 1.61E-13 | 55.75069823 |
| anxitey | fibromyalgia | rs77165542 | T | C | 0.0082 | 0.0341 | 0.0015 | 4.61E-08 | 29.88422313 |
| anxitey | fibromyalgia | rs8054556 | A | G | -0.0089 | 0.4647 | 0.0015 | 5.09E-09 | 35.20418373 |

| Table S2 Characteristics of selected SNPs | | | | | | | | | |
| --- | --- | --- | --- | --- | --- | --- | --- | --- | --- |
| exposure | outcome | SNP | ea | oa | beta | eaf | se | pval | F statistic |
| guilty | fibromyalgia | rs10119773 | A | G | -0.015734849 | 0.465998 | 0.002377943 | 3.67E-11 | 43.78444347 |
| guilty | fibromyalgia | rs12420205 | T | C | 0.014957392 | 0.677505 | 0.002502073 | 2.26E-09 | 35.73628657 |
| guilty | fibromyalgia | rs12528131 | A | G | -0.014921473 | 0.5174 | 0.002324217 | 1.37E-10 | 41.21617682 |
| guilty | fibromyalgia | rs1557339 | A | C | -0.016664905 | 0.738067 | 0.002659152 | 3.69E-10 | 39.27507147 |
| guilty | fibromyalgia | rs2109648 | A | G | 0.014110267 | 0.63965 | 0.002416142 | 5.22E-09 | 34.10540539 |
| guilty | fibromyalgia | rs34657012 | A | C | 0.015476738 | 0.279037 | 0.002584626 | 2.13E-09 | 35.8559397 |
| guilty | fibromyalgia | rs55769038 | A | G | -0.016083331 | 0.578002 | 0.002350677 | 7.83E-12 | 46.81270557 |
| guilty | fibromyalgia | rs681875 | A | C | 0.017006068 | 0.206279 | 0.002871677 | 3.18E-09 | 35.0698814 |
| guilty | fibromyalgia | rs77804065 | T | C | 0.017505573 | 0.217158 | 0.002833534 | 6.48E-10 | 38.16747537 |

| Table S3 Characteristics of selected SNPs | | | | | | | | | |
| --- | --- | --- | --- | --- | --- | --- | --- | --- | --- |
| exposure | outcome | SNP | ea | oa | beta | eaf | pval | se | F statistic |
| depression | fibromyalgia | rs10020288 | A | G | -0.01346 | 0.3604 | 2.56E-08 | 0.002416 | 31.03800747 |
| depression | fibromyalgia | rs10144845 | T | C | 0.01604 | 0.6833 | 1.05E-10 | 0.002483 | 41.73043024 |
| depression | fibromyalgia | rs10950393 | C | T | 0.01561 | 0.4172 | 2.37E-11 | 0.002336 | 44.65372595 |
| depression | fibromyalgia | rs11039149 | G | A | 0.01936 | 0.2775 | 6.01E-14 | 0.002579 | 56.35151483 |
| depression | fibromyalgia | rs11209175 | T | C | -0.01453 | 0.6348 | 1.65E-09 | 0.00241 | 36.34918827 |
| depression | fibromyalgia | rs11599236 | C | T | -0.01585 | 0.41 | 3.31E-11 | 0.00239 | 43.98051441 |
| depression | fibromyalgia | rs11605020 | A | G | 0.01387 | 0.5136 | 3.59E-09 | 0.002351 | 34.80528845 |
| depression | fibromyalgia | rs11608355 | C | T | 0.01457 | 0.3148 | 5.10E-09 | 0.002494 | 34.12901692 |
| depression | fibromyalgia | rs11693031 | G | A | -0.01573 | 0.3211 | 4.59E-10 | 0.002524 | 38.83974032 |
| depression | fibromyalgia | rs12967855 | G | A | -0.01741 | 0.6711 | 2.11E-12 | 0.002478 | 49.36197317 |
| depression | fibromyalgia | rs13122395 | A | G | 0.01356 | 0.3255 | 3.63E-08 | 0.002461 | 30.35943781 |
| depression | fibromyalgia | rs1422192 | A | G | 0.01917 | 0.158 | 1.44E-09 | 0.003168 | 36.61604671 |
| depression | fibromyalgia | rs1542212 | G | T | 0.0133 | 0.3923 | 2.31E-08 | 0.002381 | 31.20197357 |
| depression | fibromyalgia | rs17432675 | C | T | -0.01373 | 0.3266 | 4.04E-08 | 0.002502 | 30.11369429 |
| depression | fibromyalgia | rs1782179 | C | T | 0.01471 | 0.7267 | 1.50E-08 | 0.002597 | 32.08329907 |
| depression | fibromyalgia | rs2042555 | A | G | 0.0144 | 0.415 | 9.45E-10 | 0.002354 | 37.4205047 |
| depression | fibromyalgia | rs209156 | A | C | 0.02831 | 0.05364 | 4.03E-08 | 0.005157 | 30.13582251 |
| depression | fibromyalgia | rs2149351 | G | T | -0.0162 | 0.7584 | 2.27E-09 | 0.002711 | 35.70825006 |
| depression | fibromyalgia | rs2396133 | G | A | 0.01326 | 0.4762 | 1.18E-08 | 0.002325 | 32.52660286 |
| depression | fibromyalgia | rs2717043 | T | C | 0.01528 | 0.6234 | 1.64E-10 | 0.00239 | 40.87412606 |
| depression | fibromyalgia | rs28893517 | G | A | 0.02848 | 0.06824 | 5.16E-10 | 0.004583 | 38.61693747 |
| depression | fibromyalgia | rs2895249 | A | G | -0.0133 | 0.3913 | 2.34E-08 | 0.002381 | 31.20197357 |
| depression | fibromyalgia | rs297346 | G | A | -0.0162 | 0.6383 | 1.81E-11 | 0.00241 | 45.18491997 |
| depression | fibromyalgia | rs35738585 | G | T | -0.01722 | 0.4341 | 1.73E-13 | 0.002337 | 54.29332546 |
| depression | fibromyalgia | rs35755513 | T | C | 0.02414 | 0.07424 | 4.12E-08 | 0.0044 | 30.10001777 |
| depression | fibromyalgia | rs3795310 | T | C | 0.01376 | 0.4518 | 3.24E-09 | 0.002325 | 35.02583737 |
| depression | fibromyalgia | rs4578918 | C | T | -0.01792 | 0.7395 | 1.03E-11 | 0.002634 | 46.28518915 |
| depression | fibromyalgia | rs4625 | G | A | -0.01564 | 0.3067 | 4.21E-10 | 0.002503 | 39.04355657 |
| depression | fibromyalgia | rs4632195 | T | C | 0.0159 | 0.5126 | 6.63E-12 | 0.002316 | 47.13187444 |
| depression | fibromyalgia | rs55965054 | T | C | -0.01391 | 0.5587 | 2.67E-09 | 0.002337 | 35.42700256 |
| depression | fibromyalgia | rs59382200 | G | A | -0.01581 | 0.4009 | 2.44E-11 | 0.002368 | 44.57567386 |
| depression | fibromyalgia | rs599550 | A | G | 0.02725 | 0.8495 | 3.69E-17 | 0.003235 | 70.95483863 |
| depression | fibromyalgia | rs60393230 | G | A | 0.01397 | 0.5957 | 3.57E-09 | 0.002366 | 34.86269088 |
| depression | fibromyalgia | rs62172117 | A | G | -0.01405 | 0.3572 | 6.19E-09 | 0.002417 | 33.79067919 |
| depression | fibromyalgia | rs6795372 | G | T | 0.0145 | 0.3707 | 1.39E-09 | 0.002393 | 36.71539296 |
| depression | fibromyalgia | rs6818081 | T | C | 0.01805 | 0.1478 | 2.83E-08 | 0.003251 | 30.82606196 |
| depression | fibromyalgia | rs6900114 | A | G | -0.01464 | 0.2653 | 2.30E-08 | 0.002621 | 31.19935998 |
| depression | fibromyalgia | rs7175083 | C | T | -0.01467 | 0.5224 | 2.21E-10 | 0.002311 | 40.2956263 |
| depression | fibromyalgia | rs721496 | A | G | 0.01561 | 0.252 | 4.60E-09 | 0.002663 | 34.36062436 |
| depression | fibromyalgia | rs7502590 | G | A | -0.01801 | 0.1476 | 3.12E-08 | 0.003254 | 30.63302617 |
| depression | fibromyalgia | rs75650221 | T | C | -0.03572 | 0.03814 | 3.08E-09 | 0.006026 | 35.13680102 |
| depression | fibromyalgia | rs76923064 | C | T | 0.05634 | 0.01298 | 3.24E-08 | 0.01019 | 30.56911676 |
| depression | fibromyalgia | rs77087420 | G | A | -0.03284 | 0.05457 | 1.06E-10 | 0.005085 | 41.70824883 |
| depression | fibromyalgia | rs77607745 | C | A | 0.01614 | 0.1897 | 4.95E-08 | 0.002959 | 29.75189988 |
| depression | fibromyalgia | rs836927 | A | C | 0.01484 | 0.427 | 4.11E-10 | 0.002374 | 39.07544622 |
| depression | fibromyalgia | rs9852417 | A | C | -0.0131 | 0.5896 | 2.84E-08 | 0.002361 | 30.78564029 |
| depression | fibromyalgia | rs9858071 | C | T | 0.01607 | 0.2881 | 3.25E-10 | 0.002556 | 39.52825368 |
| depression | fibromyalgia | rs9930139 | C | A | 0.01351 | 0.5876 | 1.19E-08 | 0.002369 | 32.52206774 |

| Table S4 Characteristics of selected SNPs | | | | | | | | | |
| --- | --- | --- | --- | --- | --- | --- | --- | --- | --- |
| exposure | outcome | SNP | ea | oa | beta | eaf | se | pval | F statistic | |
| irritability | fibromyalgia | rs10231331 | G | A | 0.0325832 | 0.5089 | 0.00512675 | 2.08E-10 | 40.39253016 | |
| irritability | fibromyalgia | rs113146341 | T | C | 0.0449569 | 0.2097 | 0.00653915 | 6.20E-12 | 47.2659057 | |
| irritability | fibromyalgia | rs11913445 | A | C | -0.0425427 | 0.166 | 0.00681247 | 4.24E-10 | 38.99767922 | |
| irritability | fibromyalgia | rs13257887 | C | T | 0.050197 | 0.5487 | 0.00578628 | 4.13E-18 | 75.25831733 | |
| irritability | fibromyalgia | rs144443274 | T | C | -0.0428314 | 0.173 | 0.00678799 | 2.79E-10 | 39.81438597 | |
| irritability | fibromyalgia | rs16884419 | A | G | 0.0378484 | 0.2594 | 0.00594747 | 1.97E-10 | 40.49751728 | |
| irritability | fibromyalgia | rs17468966 | C | T | -0.0782519 | 0.0159 | 0.0141221 | 3.01E-08 | 30.703585 | |
| irritability | fibromyalgia | rs17724256 | G | A | -0.0391318 | 0.1352 | 0.00706234 | 3.01E-08 | 30.70154821 | |
| irritability | fibromyalgia | rs17781446 | T | C | 0.0559297 | 0.0746 | 0.0100288 | 2.45E-08 | 31.1017559 | |
| irritability | fibromyalgia | rs1782170 | C | A | 0.0319802 | 0.7445 | 0.00565044 | 1.52E-08 | 32.03285776 | |
| irritability | fibromyalgia | rs1806153 | T | G | 0.0350306 | 0.2018 | 0.00599311 | 5.06E-09 | 34.16555844 | |
| irritability | fibromyalgia | rs200559118 | C | T | -0.0410595 | - | 0.00671514 | 9.69E-10 | 37.3865198 | |
| irritability | fibromyalgia | rs2006810 | C | T | -0.0321826 | 0.3956 | 0.00517113 | 4.86E-10 | 38.73193664 | |
| irritability | fibromyalgia | rs3124401 | T | C | -0.0328513 | 0.7555 | 0.00568314 | 7.45E-09 | 33.4138317 | |
| irritability | fibromyalgia | rs34340612 | A | G | -0.0347721 | 0.2117 | 0.00613268 | 1.43E-08 | 32.14838063 | |
| irritability | fibromyalgia | rs343936 | C | T | -0.0405292 | 0.1859 | 0.00676969 | 2.14E-09 | 35.84234113 | |
| irritability | fibromyalgia | rs35431455 | C | T | -0.0436869 | 0.4404 | 0.00506672 | 6.56E-18 | 74.34410154 | |
| irritability | fibromyalgia | rs35733768 | A | G | -0.0555423 | 0.0785 | 0.0100272 | 3.04E-08 | 30.68218151 | |
| irritability | fibromyalgia | rs3814424 | T | C | 0.0446501 | 0.172 | 0.00694651 | 1.30E-10 | 41.31515734 | |
| irritability | fibromyalgia | rs4295863 | A | C | -0.0288634 | 0.4642 | 0.00510783 | 1.60E-08 | 31.93154827 | |
| irritability | fibromyalgia | rs4308307 | T | C | -0.0328205 | 0.6451 | 0.00520562 | 2.89E-10 | 39.75056731 | |
| irritability | fibromyalgia | rs477424 | G | A | 0.028018 | 0.4254 | 0.00509788 | 3.88E-08 | 30.20597893 | |
| irritability | fibromyalgia | rs4903249 | T | C | 0.0283421 | 0.5 | 0.00503934 | 1.86E-08 | 31.63112222 | |
| irritability | fibromyalgia | rs4953150 | T | C | 0.0318094 | 0.337 | 0.00534082 | 2.59E-09 | 35.47259348 | |
| irritability | fibromyalgia | rs600011 | C | A | 0.0307788 | 0.2724 | 0.00549752 | 2.16E-08 | 31.34495141 | |
| irritability | fibromyalgia | rs6059911 | G | T | -0.045327 | 0.8797 | 0.00656711 | 5.12E-12 | 47.63906619 | |
| irritability | fibromyalgia | rs62488598 | G | T | 0.0330469 | 0.2396 | 0.00597958 | 3.26E-08 | 30.54344088 | |
| irritability | fibromyalgia | rs62491417 | A | C | -0.061242 | 0.0457 | 0.0101587 | 1.65E-09 | 36.34296281 | |
| irritability | fibromyalgia | rs6718682 | T | C | -0.0311312 | 0.2664 | 0.00565283 | 3.65E-08 | 30.32897569 | |
| irritability | fibromyalgia | rs7235757 | A | G | 0.0403331 | 0.3151 | 0.00547887 | 1.82E-13 | 54.19248729 | |
| irritability | fibromyalgia | rs73379978 | C | T | 0.103243 | 0.0209 | 0.0183957 | 2.00E-08 | 31.4982528 | |
| irritability | fibromyalgia | rs73506872 | T | G | 0.0404598 | 0.17 | 0.00721221 | 2.02E-08 | 31.47085961 | |
| irritability | fibromyalgia | rs73646317 | G | A | -0.0425413 | 0.1481 | 0.00770793 | 3.41E-08 | 30.46097921 | |
| irritability | fibromyalgia | rs9810464 | A | G | 0.0284478 | 0.3748 | 0.0051777 | 3.92E-08 | 30.18710566 | |
| irritability | fibromyalgia | rs999483 | G | T | 0.0414071 | 0.2197 | 0.00582153 | 1.14E-12 | 50.59099494 | |

| Table S5 Characteristics of selected SNPs | | | | | | | | | |
| --- | --- | --- | --- | --- | --- | --- | --- | --- | --- |
| exposure | outcome | SNP | ea | oa | beta | eaf | se | pval | F statistic |
| insomnia | fibromyalgia | rs10838708 | A | G | -0.00947656 | 0.45899 | 0.00150271 | 2.90E-10 | 39.76941491 |
| insomnia | fibromyalgia | rs11097861 | G | A | 0.0100437 | 0.716256 | 0.00164946 | 1.10E-09 | 37.07677992 |
| insomnia | fibromyalgia | rs11152363 | A | G | 0.0156393 | 0.186319 | 0.00192518 | 4.50E-16 | 65.99181298 |
| insomnia | fibromyalgia | rs113851554 | T | G | 0.0467802 | 0.057291 | 0.00331329 | 2.90E-45 | 199.3440926 |
| insomnia | fibromyalgia | rs11635495 | C | T | 0.00937342 | 0.512179 | 0.00148509 | 2.80E-10 | 39.83719286 |
| insomnia | fibromyalgia | rs11790060 | C | T | -0.0103391 | 0.330834 | 0.00157854 | 5.80E-11 | 42.89951777 |
| insomnia | fibromyalgia | rs12470989 | G | A | -0.0102429 | 0.203934 | 0.00184485 | 2.80E-08 | 30.82633301 |
| insomnia | fibromyalgia | rs1430205 | T | C | 0.00947493 | 0.461507 | 0.00149107 | 2.10E-10 | 40.37886216 |
| insomnia | fibromyalgia | rs1547630 | A | G | 0.00910814 | 0.651513 | 0.00156447 | 5.80E-09 | 33.89401654 |
| insomnia | fibromyalgia | rs17151854 | T | G | 0.0129893 | 0.15241 | 0.00207434 | 3.80E-10 | 39.21116375 |
| insomnia | fibromyalgia | rs17709610 | G | A | -0.0099161 | 0.297979 | 0.00162078 | 9.50E-10 | 37.4310301 |
| insomnia | fibromyalgia | rs1988337 | G | A | 0.00838726 | 0.552395 | 0.00149645 | 2.10E-08 | 31.41332535 |
| insomnia | fibromyalgia | rs2014830 | T | C | -0.0116018 | 0.303519 | 0.0016233 | 8.90E-13 | 51.08004757 |
| insomnia | fibromyalgia | rs2062113 | C | T | -0.00961678 | 0.568257 | 0.00150275 | 1.60E-10 | 40.95283861 |
| insomnia | fibromyalgia | rs224032 | A | G | 0.00839066 | 0.550358 | 0.00149108 | 1.80E-08 | 31.66565515 |
| insomnia | fibromyalgia | rs2604551 | G | T | -0.00848084 | 0.640384 | 0.00155238 | 4.70E-08 | 29.84556352 |
| insomnia | fibromyalgia | rs314280 | G | A | 0.00971363 | 0.547047 | 0.00149134 | 7.30E-11 | 42.42363739 |
| insomnia | fibromyalgia | rs324017 | C | A | -0.00988248 | 0.705433 | 0.00163145 | 1.40E-09 | 36.69293681 |
| insomnia | fibromyalgia | rs4572538 | T | C | -0.00960596 | 0.364055 | 0.00156161 | 7.70E-10 | 37.8385518 |
| insomnia | fibromyalgia | rs4577309 | G | A | -0.00854833 | 0.533655 | 0.00149214 | 1.00E-08 | 32.82022353 |
| insomnia | fibromyalgia | rs56093896 | A | C | -0.0124111 | 0.214053 | 0.00181352 | 7.70E-12 | 46.83537179 |
| insomnia | fibromyalgia | rs56330606 | G | A | 0.00930932 | 0.378954 | 0.00153044 | 1.20E-09 | 36.99997439 |
| insomnia | fibromyalgia | rs56365214 | A | C | -0.0147948 | 0.155781 | 0.00205225 | 5.60E-13 | 51.97036774 |
| insomnia | fibromyalgia | rs6690017 | G | T | -0.0102669 | 0.408855 | 0.00151022 | 1.10E-11 | 46.21642524 |
| insomnia | fibromyalgia | rs68094047 | T | C | 0.0103356 | 0.251267 | 0.0017167 | 1.70E-09 | 36.24771993 |
| insomnia | fibromyalgia | rs6975972 | G | A | -0.00902066 | 0.578726 | 0.00150428 | 2.00E-09 | 35.95980984 |
| insomnia | fibromyalgia | rs72924721 | T | C | 0.016478 | 0.073137 | 0.00288103 | 1.10E-08 | 32.71233591 |
| insomnia | fibromyalgia | rs7711696 | T | G | 0.0111716 | 0.305042 | 0.00161138 | 4.10E-12 | 48.06544174 |
| insomnia | fibromyalgia | rs9570080 | C | T | -0.0106379 | 0.344131 | 0.00157858 | 1.60E-11 | 45.41263856 |
| insomnia | fibromyalgia | rs9845387 | A | C | -0.0218562 | 0.040279 | 0.00377648 | 7.10E-09 | 33.49446579 |
| insomnia | fibromyalgia | rs9894577 | A | G | 0.0132051 | 0.3182 | 0.00159687 | 1.30E-16 | 68.3820925 |
| insomnia | fibromyalgia | rs9906181 | G | A | -0.00915026 | 0.687567 | 0.00163869 | 2.40E-08 | 31.1796606 |

| Table S6 Characteristics of selected SNPs | | | | | | | | | |
| --- | --- | --- | --- | --- | --- | --- | --- | --- | --- |
| exposure | outcome | SNP | ea | oa | beta | eaf | pval | se | F statistic |
| depression | insomnia | rs10020288 | A | G | -0.01346 | 0.3604 | 2.56E-08 | 0.002416 | 31.03800747 |
| depression | insomnia | rs10144845 | T | C | 0.01604 | 0.6833 | 1.05E-10 | 0.002483 | 41.73043024 |
| depression | insomnia | rs10950393 | C | T | 0.01561 | 0.4172 | 2.37E-11 | 0.002336 | 44.65372595 |
| depression | insomnia | rs11039149 | G | A | 0.01936 | 0.2775 | 6.01E-14 | 0.002579 | 56.35151483 |
| depression | insomnia | rs11209175 | T | C | -0.01453 | 0.6348 | 1.65E-09 | 0.00241 | 36.34918827 |
| depression | insomnia | rs11599236 | C | T | -0.01585 | 0.41 | 3.31E-11 | 0.00239 | 43.98051441 |
| depression | insomnia | rs11605020 | A | G | 0.01387 | 0.5136 | 3.59E-09 | 0.002351 | 34.80528845 |
| depression | insomnia | rs11608355 | C | T | 0.01457 | 0.3148 | 5.10E-09 | 0.002494 | 34.12901692 |
| depression | insomnia | rs11693031 | G | A | -0.01573 | 0.3211 | 4.59E-10 | 0.002524 | 38.83974032 |
| depression | insomnia | rs12938775 | A | G | -0.01288 | 0.5025 | 2.49E-08 | 0.002311 | 31.06199951 |
| depression | insomnia | rs12967855 | G | A | -0.01741 | 0.6711 | 2.11E-12 | 0.002478 | 49.36197317 |
| depression | insomnia | rs13122395 | A | G | 0.01356 | 0.3255 | 3.63E-08 | 0.002461 | 30.35943781 |
| depression | insomnia | rs1422192 | A | G | 0.01917 | 0.158 | 1.44E-09 | 0.003168 | 36.61604671 |
| depression | insomnia | rs1542212 | G | T | 0.0133 | 0.3923 | 2.31E-08 | 0.002381 | 31.20197357 |
| depression | insomnia | rs17432675 | C | T | -0.01373 | 0.3266 | 4.04E-08 | 0.002502 | 30.11369429 |
| depression | insomnia | rs1782179 | C | T | 0.01471 | 0.7267 | 1.50E-08 | 0.002597 | 32.08329907 |
| depression | insomnia | rs2042555 | A | G | 0.0144 | 0.415 | 9.45E-10 | 0.002354 | 37.4205047 |
| depression | insomnia | rs209156 | A | C | 0.02831 | 0.05364 | 4.03E-08 | 0.005157 | 30.13582251 |
| depression | insomnia | rs2149351 | G | T | -0.0162 | 0.7584 | 2.27E-09 | 0.002711 | 35.70825006 |
| depression | insomnia | rs2396133 | G | A | 0.01326 | 0.4762 | 1.18E-08 | 0.002325 | 32.52660286 |
| depression | insomnia | rs2717043 | T | C | 0.01528 | 0.6234 | 1.64E-10 | 0.00239 | 40.87412606 |
| depression | insomnia | rs28893517 | G | A | 0.02848 | 0.06824 | 5.16E-10 | 0.004583 | 38.61693747 |
| depression | insomnia | rs2895249 | A | G | -0.0133 | 0.3913 | 2.34E-08 | 0.002381 | 31.20197357 |
| depression | insomnia | rs297346 | G | A | -0.0162 | 0.6383 | 1.81E-11 | 0.00241 | 45.18491997 |
| depression | insomnia | rs35738585 | G | T | -0.01722 | 0.4341 | 1.73E-13 | 0.002337 | 54.29332546 |
| depression | insomnia | rs35755513 | T | C | 0.02414 | 0.07424 | 4.12E-08 | 0.0044 | 30.10001777 |
| depression | insomnia | rs3795310 | T | C | 0.01376 | 0.4518 | 3.24E-09 | 0.002325 | 35.02583737 |
| depression | insomnia | rs4578918 | C | T | -0.01792 | 0.7395 | 1.03E-11 | 0.002634 | 46.28518915 |
| depression | insomnia | rs4625 | G | A | -0.01564 | 0.3067 | 4.21E-10 | 0.002503 | 39.04355657 |
| depression | insomnia | rs4632195 | T | C | 0.0159 | 0.5126 | 6.63E-12 | 0.002316 | 47.13187444 |
| depression | insomnia | rs55965054 | T | C | -0.01391 | 0.5587 | 2.67E-09 | 0.002337 | 35.42700256 |
| depression | insomnia | rs59382200 | G | A | -0.01581 | 0.4009 | 2.44E-11 | 0.002368 | 44.57567386 |
| depression | insomnia | rs599550 | A | G | 0.02725 | 0.8495 | 3.69E-17 | 0.003235 | 70.95483863 |
| depression | insomnia | rs60393230 | G | A | 0.01397 | 0.5957 | 3.57E-09 | 0.002366 | 34.86269088 |
| depression | insomnia | rs62172117 | A | G | -0.01405 | 0.3572 | 6.19E-09 | 0.002417 | 33.79067919 |
| depression | insomnia | rs6795372 | G | T | 0.0145 | 0.3707 | 1.39E-09 | 0.002393 | 36.71539296 |
| depression | insomnia | rs6818081 | T | C | 0.01805 | 0.1478 | 2.83E-08 | 0.003251 | 30.82606196 |
| depression | insomnia | rs6900114 | A | G | -0.01464 | 0.2653 | 2.30E-08 | 0.002621 | 31.19935998 |
| depression | insomnia | rs7175083 | C | T | -0.01467 | 0.5224 | 2.21E-10 | 0.002311 | 40.2956263 |
| depression | insomnia | rs721496 | A | G | 0.01561 | 0.252 | 4.60E-09 | 0.002663 | 34.36062436 |
| depression | insomnia | rs7502590 | G | A | -0.01801 | 0.1476 | 3.12E-08 | 0.003254 | 30.63302617 |
| depression | insomnia | rs75650221 | T | C | -0.03572 | 0.03814 | 3.08E-09 | 0.006026 | 35.13680102 |
| depression | insomnia | rs76923064 | C | T | 0.05634 | 0.01298 | 3.24E-08 | 0.01019 | 30.56911676 |
| depression | insomnia | rs77087420 | G | A | -0.03284 | 0.05457 | 1.06E-10 | 0.005085 | 41.70824883 |
| depression | insomnia | rs77607745 | C | A | 0.01614 | 0.1897 | 4.95E-08 | 0.002959 | 29.75189988 |
| depression | insomnia | rs836927 | A | C | 0.01484 | 0.427 | 4.11E-10 | 0.002374 | 39.07544622 |
| depression | insomnia | rs9852417 | A | C | -0.0131 | 0.5896 | 2.84E-08 | 0.002361 | 30.78564029 |
| depression | insomnia | rs9858071 | C | T | 0.01607 | 0.2881 | 3.25E-10 | 0.002556 | 39.52825368 |
| depression | insomnia | rs9930139 | C | A | 0.01351 | 0.5876 | 1.19E-08 | 0.002369 | 32.52206774 |

| Table S7 Characteristics of selected SNPs | | | | | | | | | |
| --- | --- | --- | --- | --- | --- | --- | --- | --- | --- |
| exposure | outcome | SNP | ea | oa | beta | eaf | se | pval | F statistic |
| irritability | insomnia | rs10231331 | G | A | 0.0325832 | 0.5089 | 0.00512675 | 2.08E-10 | 40.39253016 |
| irritability | insomnia | rs113146341 | T | C | 0.0449569 | 0.2097 | 0.00653915 | 6.20E-12 | 47.2659057 |
| irritability | insomnia | rs11913445 | A | C | -0.0425427 | 0.166 | 0.00681247 | 4.24E-10 | 38.99767922 |
| irritability | insomnia | rs13257887 | C | T | 0.050197 | 0.5487 | 0.00578628 | 4.13E-18 | 75.25831733 |
| irritability | insomnia | rs16884419 | A | G | 0.0378484 | 0.2594 | 0.00594747 | 1.97E-10 | 40.49751728 |
| irritability | insomnia | rs17468966 | C | T | -0.0782519 | 0.0159 | 0.0141221 | 3.01E-08 | 30.703585 |
| irritability | insomnia | rs17724256 | G | A | -0.0391318 | 0.1352 | 0.00706234 | 3.01E-08 | 30.70154821 |
| irritability | insomnia | rs17781446 | T | C | 0.0559297 | 0.0746 | 0.0100288 | 2.45E-08 | 31.1017559 |
| irritability | insomnia | rs1782170 | C | A | 0.0319802 | 0.7445 | 0.00565044 | 1.52E-08 | 32.03285776 |
| irritability | insomnia | rs1806153 | T | G | 0.0350306 | 0.2018 | 0.00599311 | 5.06E-09 | 34.16555844 |
| irritability | insomnia | rs2006810 | C | T | -0.0321826 | 0.3956 | 0.00517113 | 4.86E-10 | 38.73193664 |
| irritability | insomnia | rs3124401 | T | C | -0.0328513 | 0.7555 | 0.00568314 | 7.45E-09 | 33.4138317 |
| irritability | insomnia | rs34340612 | A | G | -0.0347721 | 0.2117 | 0.00613268 | 1.43E-08 | 32.14838063 |
| irritability | insomnia | rs343936 | C | T | -0.0405292 | 0.1859 | 0.00676969 | 2.14E-09 | 35.84234113 |
| irritability | insomnia | rs35431455 | C | T | -0.0436869 | 0.4404 | 0.00506672 | 6.56E-18 | 74.34410154 |
| irritability | insomnia | rs35733768 | A | G | -0.0555423 | 0.0785 | 0.0100272 | 3.04E-08 | 30.68218151 |
| irritability | insomnia | rs3814424 | T | C | 0.0446501 | 0.172 | 0.00694651 | 1.30E-10 | 41.31515734 |
| irritability | insomnia | rs4295863 | A | C | -0.0288634 | 0.4642 | 0.00510783 | 1.60E-08 | 31.93154827 |
| irritability | insomnia | rs4308307 | T | C | -0.0328205 | 0.6451 | 0.00520562 | 2.89E-10 | 39.75056731 |
| irritability | insomnia | rs477424 | G | A | 0.028018 | 0.4254 | 0.00509788 | 3.88E-08 | 30.20597893 |
| irritability | insomnia | rs4903249 | T | C | 0.0283421 | 0.5 | 0.00503934 | 1.86E-08 | 31.63112222 |
| irritability | insomnia | rs4953150 | T | C | 0.0318094 | 0.337 | 0.00534082 | 2.59E-09 | 35.47259348 |
| irritability | insomnia | rs600011 | C | A | 0.0307788 | 0.2724 | 0.00549752 | 2.16E-08 | 31.34495141 |
| irritability | insomnia | rs6059911 | G | T | -0.045327 | 0.8797 | 0.00656711 | 5.12E-12 | 47.63906619 |
| irritability | insomnia | rs62488598 | G | T | 0.0330469 | 0.2396 | 0.00597958 | 3.26E-08 | 30.54344088 |
| irritability | insomnia | rs62491417 | A | C | -0.061242 | 0.0457 | 0.0101587 | 1.65E-09 | 36.34296281 |
| irritability | insomnia | rs6718682 | T | C | -0.0311312 | 0.2664 | 0.00565283 | 3.65E-08 | 30.32897569 |
| irritability | insomnia | rs7235757 | A | G | 0.0403331 | 0.3151 | 0.00547887 | 1.82E-13 | 54.19248729 |
| irritability | insomnia | rs73379978 | C | T | 0.103243 | 0.0209 | 0.0183957 | 2.00E-08 | 31.4982528 |
| irritability | insomnia | rs73506872 | T | G | 0.0404598 | 0.17 | 0.00721221 | 2.02E-08 | 31.47085961 |
| irritability | insomnia | rs73646317 | G | A | -0.0425413 | 0.1481 | 0.00770793 | 3.41E-08 | 30.46097921 |
| irritability | insomnia | rs9810464 | A | G | 0.0284478 | 0.3748 | 0.0051777 | 3.92E-08 | 30.18710566 |
| irritability | insomnia | rs999483 | G | T | 0.0414071 | 0.2197 | 0.00582153 | 1.14E-12 | 50.59099494 |

| Table S8 MR analysis of the causal relationship between exposures and fibromyalgia | | | | | | | | |
| --- | --- | --- | --- | --- | --- | --- | --- | --- |
| exposures | method | nsnp | b | se | pval | or | or_lci95 | or_uci95 |
| Anxiety | MR Egger | 13 | 8.186358646 | 19.18873452 | 0.677883454 | 3591.620045 | 1.67E-13 | 7.74588E+19 |
| Weighted median | 13 | 2.002722922 | 2.396231083 | 0.403278467 | 7.409203342 | 0.067617395 | 811.8664414 |
| Inverse variance weighted | 13 | 1.753832757 | 1.981841423 | 0.376183003 | 5.776700994 | 0.118768812 | 280.9683264 |
| Simple mode | 13 | 1.712773378 | 3.439200622 | 0.627474829 | 5.544316662 | 0.006551509 | 4691.964285 |
| Weighted mode | 13 | 1.712773378 | 3.119582719 | 0.593048063 | 5.544316662 | 0.012257605 | 2507.785839 |
| guilty | MR Egger | 9 | 7.919005289 | 21.16949096 | 0.719421016 | 2749.03519 | 2.63E-15 | 2.88E+21 |
| Weighted median | 9 | 1.922982278 | 1.7497111 | 0.271755657 | 6.841330829 | 0.221695275 | 211.1177498 |
| Inverse variance weighted | 9 | 1.543534052 | 1.281319241 | 0.228340607 | 4.681104338 | 0.379898313 | 57.68053474 |
| Simple mode | 9 | -1.728819086 | 2.865466484 | 0.56300032 | 0.177493891 | 0.000645727 | 48.78852893 |
| Weighted mode | 9 | 3.155731046 | 2.931527352 | 0.313101166 | 23.47018862 | 0.075015347 | 7343.160812 |
| insomnia | MR Egger | 32 | 2.315379969 | 2.494879261 | 0.360787243 | 10.1287708 | 0.076185556 | 1346.606926 |
| Weighted median | 32 | 2.245679991 | 1.327247818 | 0.090649323 | 9.446837141 | 0.700664764 | 127.3686598 |
| Inverse variance weighted | 32 | 2.127683166 | 0.919793057 | 0.020710578 | 8.395393525 | 1.383876713 | 50.93129451 |
| Simple mode | 32 | 2.929261552 | 2.340515571 | 0.220097648 | 18.71380623 | 0.19049126 | 1838.438908 |
| Weighted mode | 32 | 2.394004824 | 1.782781413 | 0.189071406 | 10.9572882 | 0.332788959 | 360.775685 |
| depression | MR Egger | 48 | 2.00805142 | 2.506960508 | 0.427255168 | 7.448788638 | 0.054716434 | 1014.036334 |
| Weighted median | 48 | 2.127328023 | 0.785577228 | 0.006769395 | 8.392412495 | 1.799658017 | 39.13665086 |
| Inverse variance weighted | 48 | 1.909392398 | 0.550872315 | 0.000528017 | 6.748986854 | 2.292591095 | 19.86783586 |
| Simple mode | 48 | 2.010650681 | 1.768104793 | 0.261228184 | 7.468175164 | 0.233438945 | 238.9217456 |
| Weighted mode | 48 | 2.158989455 | 1.803209649 | 0.237192184 | 8.662379509 | 0.252763387 | 296.8658543 |
| Irritability | MR Egger | 35 | 1.200211231 | 1.43629684 | 0.40937337 | 3.320818309 | 0.198904479 | 55.44286533 |
| Weighted median | 35 | 0.724611169 | 0.433470268 | 0.094593088 | 2.063928425 | 0.882505236 | 4.826940814 |
| Inverse variance weighted | 35 | 0.627447334 | 0.308462276 | 0.041940135 | 1.872823778 | 1.023124595 | 3.428193321 |
| Simple mode | 35 | 0.977137169 | 0.939563691 | 0.305683823 | 2.656839261 | 0.42130103 | 16.75475339 |
| Weighted mode | 35 | 1.021608374 | 0.998798249 | 0.313607522 | 2.777658687 | 0.392179281 | 19.67311418 |

| Table S9 MR analysis of the causal relationship between exposures and insomnia | | | | | | | | |
| --- | --- | --- | --- | --- | --- | --- | --- | --- |
| exposures | method | nsnp | b | se | pval | or | or_lci95 | or_uci95 |
| depression | MR Egger | 49 | 0.050433129 | 0.099573124 | 0.614878209 | 1.051726531 | 0.865255712 | 1.278383582 |
| Weighted median | 49 | 0.191913282 | 0.023145702 | 1.12E-16 | 1.211565448 | 1.157830167 | 1.267794602 |
| Inverse variance weighted | 49 | 0.207375084 | 0.022058622 | 5.40E-21 | 1.230444005 | 1.178379495 | 1.284808889 |
| Simple mode | 49 | 0.195106438 | 0.047546327 | 0.00015687 | 1.215440349 | 1.107290054 | 1.334153807 |
| Weighted mode | 49 | 0.191162003 | 0.050708967 | 0.00044767 | 1.210655566 | 1.096115348 | 1.337164835 |
| irritability | MR Egger | 33 | 0.000450641 | 0.077530299 | 0.995399603 | 1.000450743 | 0.859410366 | 1.164637673 |
| Weighted median | 33 | 0.066919252 | 0.015310436 | 1.24E-05 | 1.069209139 | 1.03760046 | 1.10178072 |
| Inverse variance weighted | 33 | 0.080380465 | 0.017936437 | 7.42E-06 | 1.083699299 | 1.046263293 | 1.12247479 |
| Simple mode | 33 | 0.060571581 | 0.034189957 | 0.085981622 | 1.062443645 | 0.993579962 | 1.136080177 |
| Weighted mode | 33 | 0.071674784 | 0.031874486 | 0.031550796 | 1.074305906 | 1.00924325 | 1.143562941 |

| Table S10 MVMR analysis of mediating effect | | | | | | | | |
| --- | --- | --- | --- | --- | --- | --- | --- | --- |
|  | outcome | nsnp | b | se | pval | or | or_lci95 | or_uci95 |
| depression(exposure) | fibromyalgia | 43 | 0.905697917 | 0.578164681 | 0.117230417 | 2.473657728 | 0.796518552 | 7.682159493 |
| insomnia(mediator) | fibromyalgia | 35 | 2.316672362 | 0.897640117 | 0.009855807 | 10.14186962 | 1.745948103 | 58.91212877 |
| irritability(exposure) | fibromyalgia | 27 | 0.575919179 | 0.272876023 | 0.034810792 | 1.778764778 | 1.041937722 | 3.036653793 |
| insomnia(mediator) | fibromyalgia | 29 | 2.032539377 | 0.759819321 | 0.007472259 | 7.633445961 | 1.721667861 | 33.84479583 |
